# Supplementary material for: Physiological and Gene Expression Responses of Six Annual Ryegrass Cultivars to Cobalt, Lead, and Nickel Stresses
Source: MDPI journal article supplement (doi:10.3390/ijms222413583), 2021-12-18
Supplement: s1 [file s1]

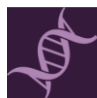

Article Supporting Information

# Physiological and gene expression responses of six annual ryegrass cultivars to cobalt, lead, and nickel stresses

Siyu Qiao<sup>1,†</sup>, Ye Tao<sup>1,†</sup>, Qinghua Shan<sup>1</sup>, Jingang Wang<sup>1</sup>, Tuanyao Chai<sup>2</sup>, Shufang Gong<sup>1,\*</sup>, Kun Qiao<sup>1,\*</sup>

<sup>1</sup> College of Horticulture and Landscape Architecture, Northeast Agricultural University, Harbin, 150030, PR China; 1359879583@qq.com (S.Q.); 314731728@qq.com (Y.T.); 1749287950@qq.com (Q.S.); wangjingang99@neau.edu.cn (J.W.); shufanggong@neau.edu.cn (S.G.); kunqiao@neau.edu.cn (K.Q.)

<sup>2</sup> College of Life Science, University of Chinese Academy of Sciences, Beijing, China; tychai@ucas.ac.cn (T.C.)

\* Correspondence: shufanggong@neau.edu.cn (K.Q.); kunqiao@neau.edu.cn

† These authors have equally contributed to the work.

**Citation:** Lastname, F.; Lastname, F.;  
Lastname, F. Title. *Int. J. Mol. Sci.*  
**2021**, *22*, 13583. <https://doi.org/10.3390/ijms222413583>

**Publisher's Note:** MDPI stays neutral with regard to jurisdictional claims in published maps and institutional affiliations.

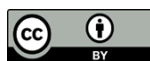

**Copyright:** © 2021 by the authors.  
Submitted for possible open access  
publication under the terms and  
conditions of the Creative Commons  
Attribution (CC BY) license  
(<https://creativecommons.org/licenses/by/4.0/>).

This supporting information contains six pages, five tables and six figures.

Tables: Table S1, Table S2, Table S3, Table S4 and Table S5

Figures: Figure S1, Figure S2, Figure S3, Figure S4, Figure S5, and Figure S6

**Table S1.** The number, cultivar's name, and provider of six ryegrass cultivars (*Lolium multiflorum*)

| Number | Cultivar's name | Provider            |
|--------|-----------------|---------------------|
| Lm1    | Splendor        | DLF-Trifolium Group |
| Lm2    | Double Barrel   | DLF-Trifolium Group |
| Lm3    | Blue Heaven     | Clover Group        |
| Lm4    | Barwoltra       | Barenbrug           |
| Lm5    | Tetragold       | Barenbrug           |
| Lm6    | Abundant        | DLF-Trifolium Group |

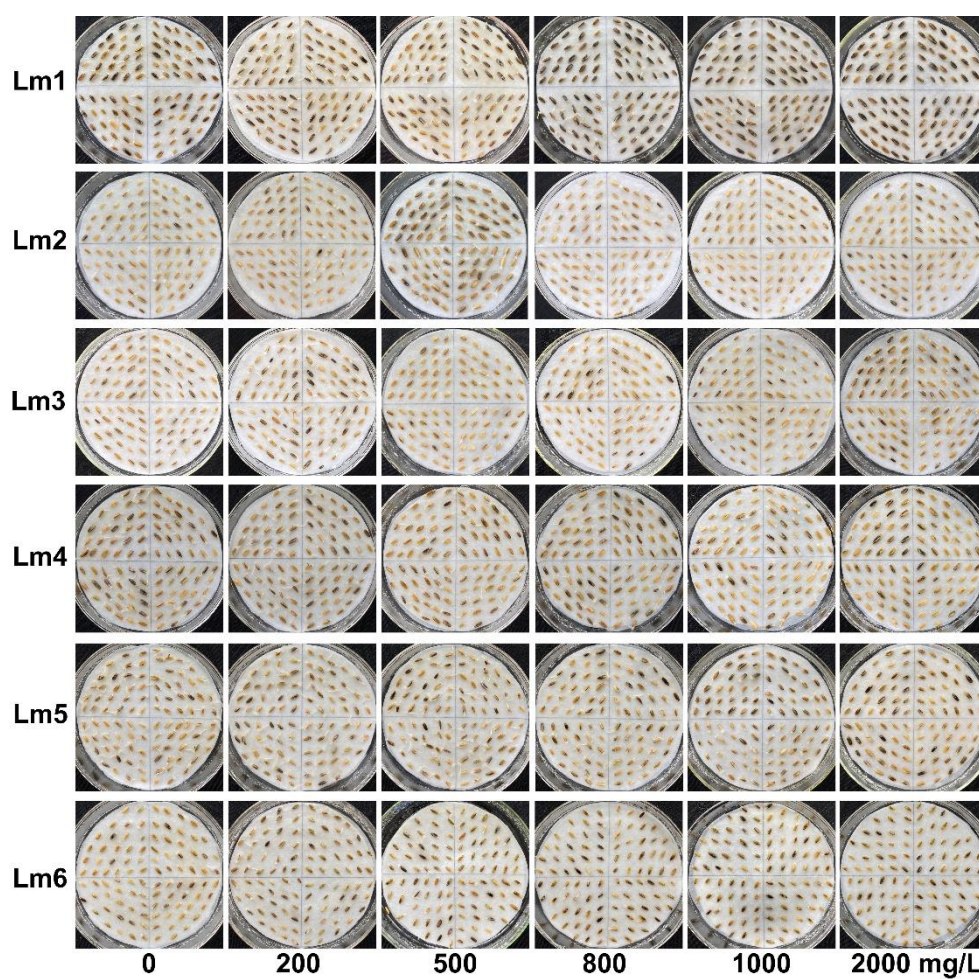

**Figure S1.** Seed germination of six ryegrass cultivars treated with different concentrations of  $\text{Co}^{2+}$ . Seeds were treated with deionized water containing 0, 200, 500, 800, 1000, or 2000 mg/L  $\text{CoCl}_2$  and germination was monitored over 5 days. Each plate was divided into four zones, each of which contained 100 seeds.



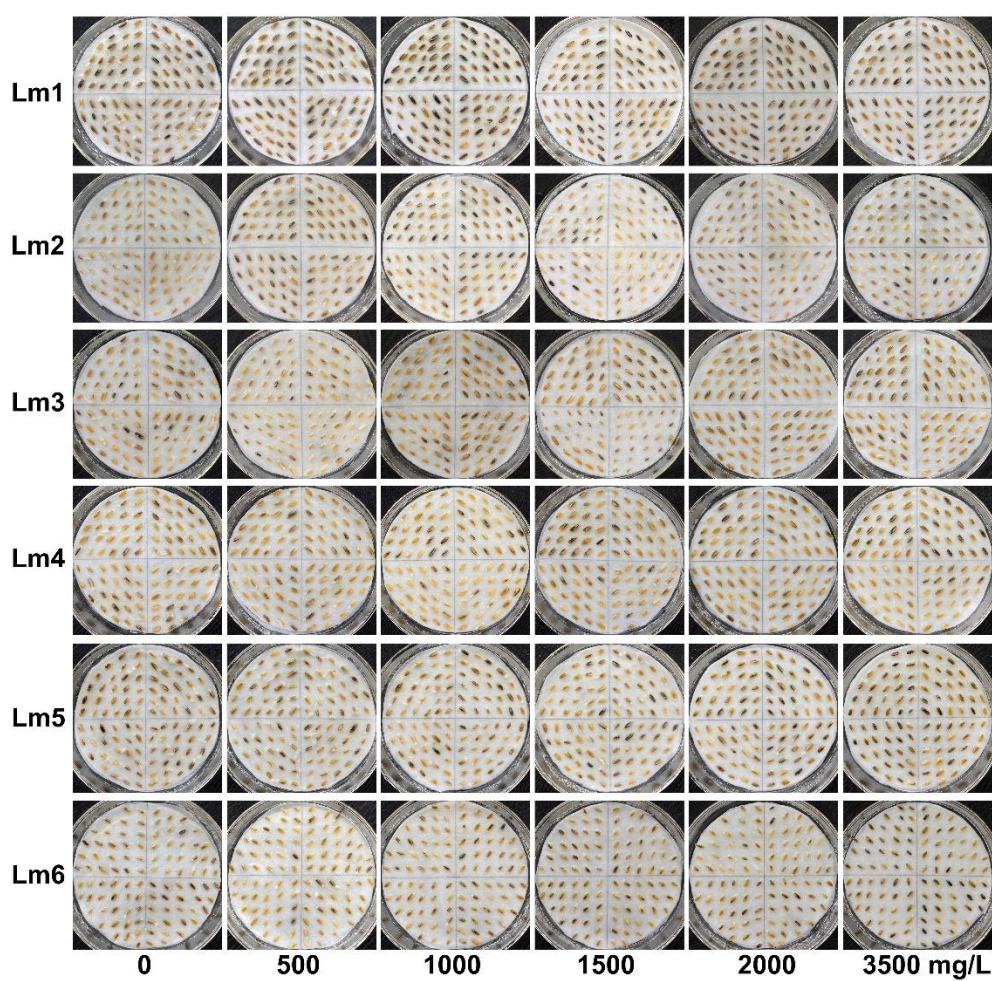

**Figure S2.** Seed germination of six ryegrass cultivars treated with different concentrations of  $Pb^{2+}$ . Seeds were treated with deionized water containing  $Pb(NO_3)_2$  at 0, 500, 1000, 1500, 2000, 3500 mg/L, and germination was monitored for 5 days.

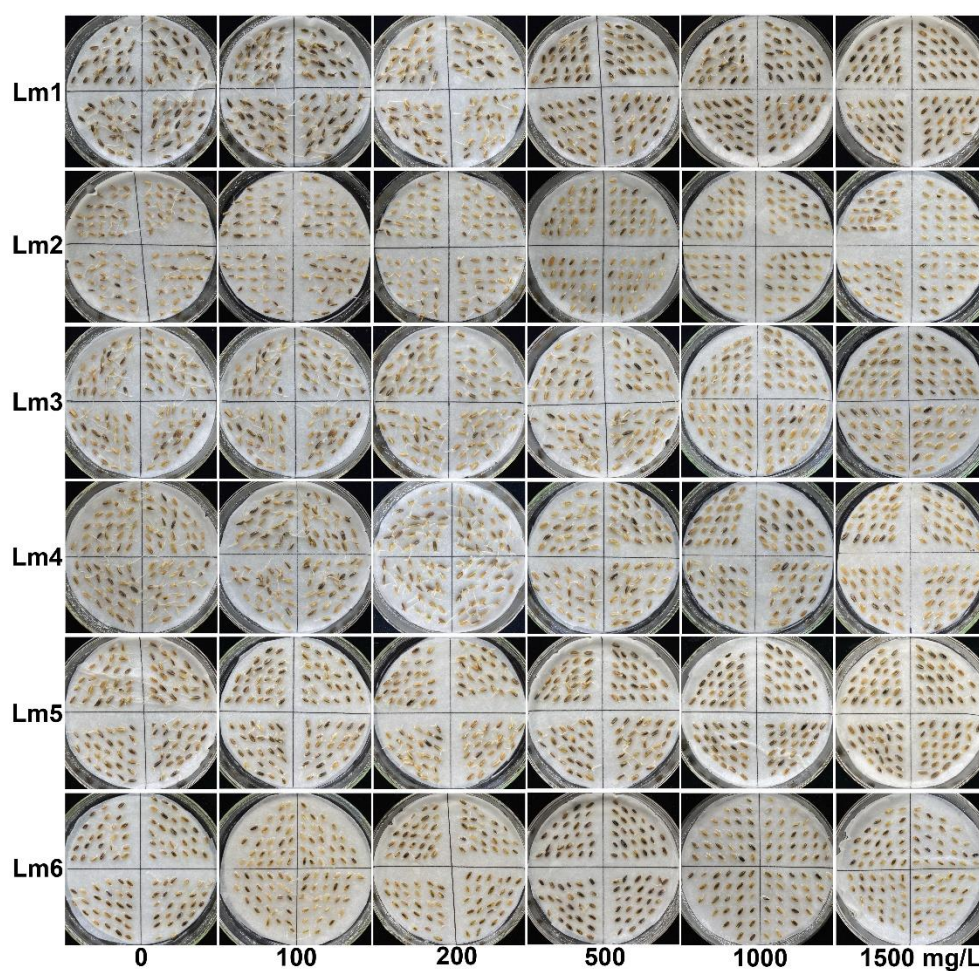

**Figure S3.** Seed germination of six ryegrass cultivars in treated with different concentrations of Ni<sup>2+</sup>. Seeds were treated with deionized water containing NiSO<sub>4</sub> at 0, 100, 200, 500, 1000, and 1500 mg/L, and germination was monitored for 5 days.



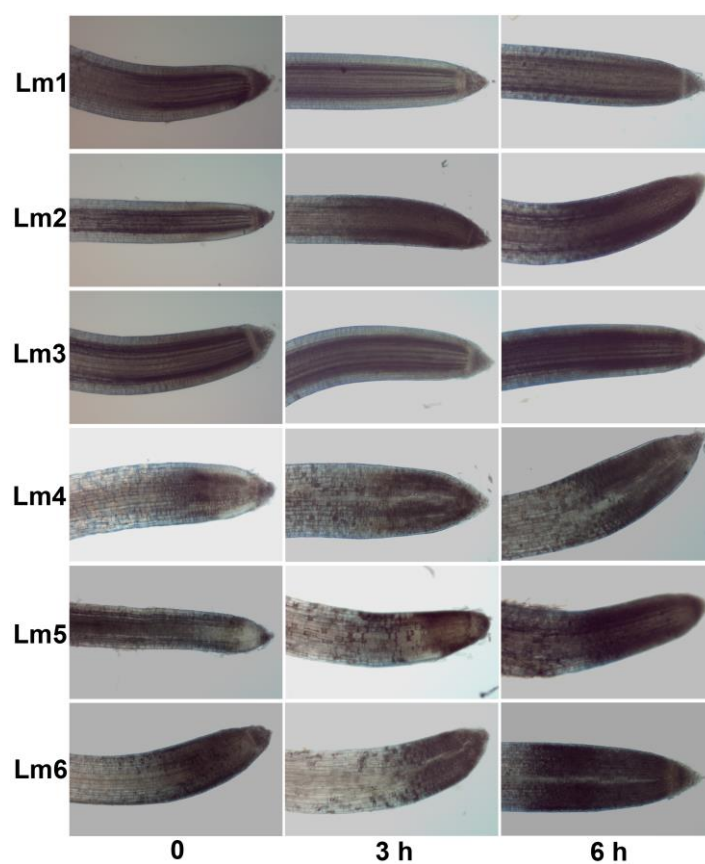

**Figure S4.** Evans blue staining of six ryegrass cultivars' roots under  $\text{CoCl}_2$  stress. These seedling roots are treated with 500 mg/L  $\text{CoCl}_2$  for 3 and 6 h. The cellular structure of roots is observed using BX41 optical microscope with Olympus DP80 CCD camera.

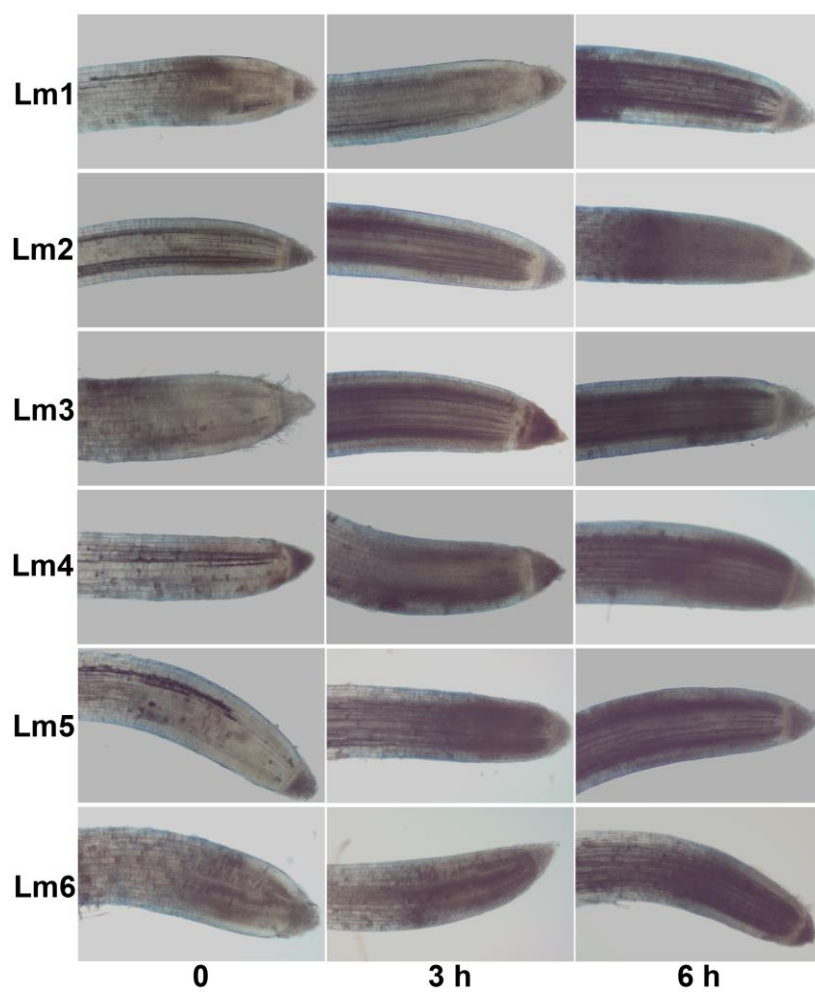

**Figure S5.** Evans blue staining of six ryegrass cultivars' roots under  $\text{Pb}(\text{NO}_3)_2$  stress. These seedling roots are treated with 1000 mg/L  $\text{Pb}(\text{NO}_3)_2$  for 3 and 6 h. The cellular structure of roots is observed using BX41 optical microscope with Olympus DP80 CCD camera.

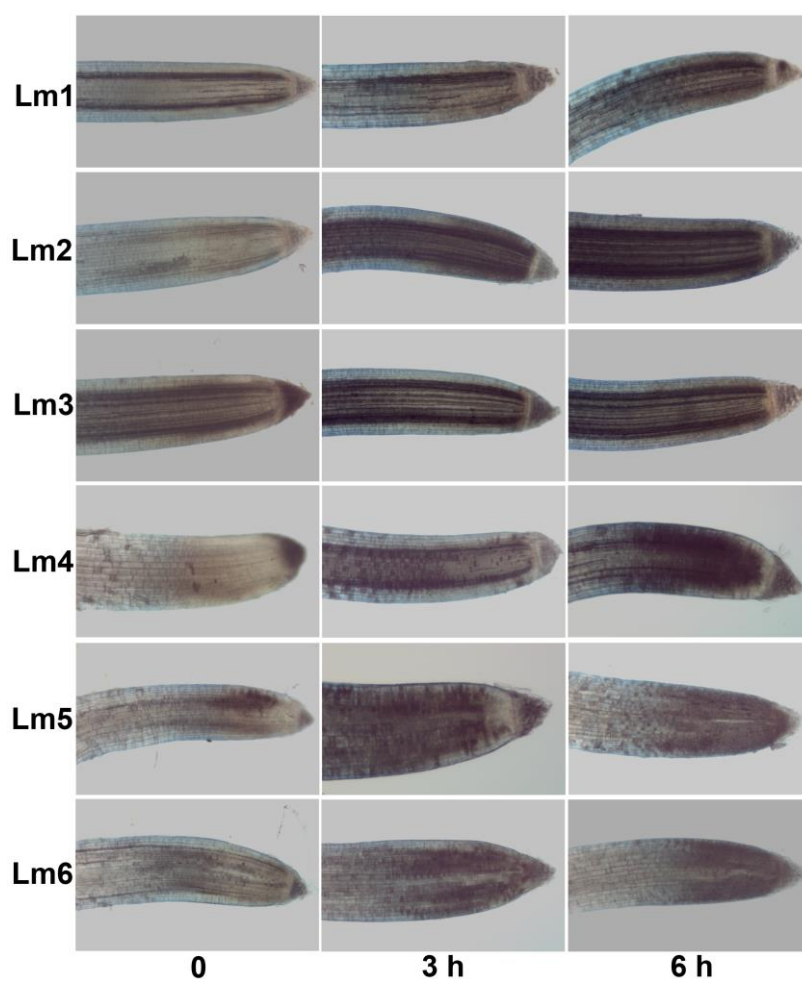

**Figure S6.** Evans blue staining of six ryegrass cultivars' roots under NiSO<sub>4</sub> stress. These seedling roots are treated with 500 mg/L NiSO<sub>4</sub> for 3 and 6 h. The cellular structure of roots is observed using BX41 optical microscope with Olympus DP80 CCD camera.



**Table S2.** Comprehensive evaluation of Co tolerance of six ryegrass cultivars

| Number | Comprehensive evaluation  |                       |                       |                      |       |            | Mean membership index value | Ranking |
|--------|---------------------------|-----------------------|-----------------------|----------------------|-------|------------|-----------------------------|---------|
|        | Relative germination rate | Relative fresh weight | Relative plant height | Relative root length | T-AOC | Extraction |                             |         |
| Lm1    | 0.6                       | 0.502                 | 0.696                 | 0.390                | 0.322 | 0.966      | 0.579                       | 1       |
| Lm2    | 0.626                     | 0.424                 | 0.390                 | 0.266                | 0     | 0.893      | 0.433                       | 6       |
| Lm3    | 0.491                     | 0.361                 | 0.496                 | 0.348                | 0.266 | 0.95       | 0.485                       | 4       |
| Lm4    | 0.668                     | 0.432                 | 0.579                 | 0.371                | 0.259 | 1          | 0.551                       | 3       |
| Lm5    | 0.738                     | 0.542                 | 0.521                 | 0.337                | 0.548 | 0          | 0.448                       | 5       |
| Lm6    | 0.571                     | 0.426                 | 0.385                 | 0.301                | 1     | 0.652      | 0.556                       | 2       |

**Table S3.** Comprehensive evaluation of Pb tolerance of six ryegrass cultivars

| Number | Comprehensive evaluation  |                       |                       |                      |       |            | Mean membership index value | Ranking |
|--------|---------------------------|-----------------------|-----------------------|----------------------|-------|------------|-----------------------------|---------|
|        | Relative germination rate | Relative fresh weight | Relative plant height | Relative root length | T-AOC | Extraction |                             |         |
| Lm1    | 0.616                     | 0.339                 | 0.491                 | 0.280                | 0.886 | 1          | 0.602                       | 1       |
| Lm2    | 0.445                     | 0.379                 | 0.401                 | 0.244                | 0.580 | 0.496      | 0.424                       | 3       |
| Lm3    | 0.498                     | 0.357                 | 0.412                 | 0.258                | 0     | 0.775      | 0.383                       | 6       |
| Lm4    | 0.455                     | 0.355                 | 0.394                 | 0.250                | 0.346 | 0.552      | 0.392                       | 5       |
| Lm5    | 0.501                     | 0.396                 | 0.465                 | 0.295                | 0.751 | 0.388      | 0.466                       | 2       |
| Lm6    | 0.417                     | 0.339                 | 0.391                 | 0.246                | 1     | 0          | 0.399                       | 4       |

**Table S4.** Comprehensive evaluation of Ni tolerance of six ryegrass cultivars

| Number | Comprehensive evaluation  |                       |                       |                      |       |            | Mean membership index value | Ranking |
|--------|---------------------------|-----------------------|-----------------------|----------------------|-------|------------|-----------------------------|---------|
|        | Relative germination rate | Relative fresh weight | Relative plant height | Relative root length | T-AOC | Extraction |                             |         |
| Lm1    | 0.572                     | 0.481                 | 0.492                 | 0.395                | 0.509 | 0.820      | 0.545                       | 1       |
| Lm2    | 0.428                     | 0.360                 | 0.402                 | 0.327                | 0.750 | 0.726      | 0.499                       | 4       |
| Lm3    | 0.584                     | 0.514                 | 0.546                 | 0.432                | 0     | 1          | 0.513                       | 2       |
| Lm4    | 0.474                     | 0.379                 | 0.459                 | 0.359                | 0.730 | 0.664      | 0.511                       | 3       |
| Lm5    | 0.524                     | 0.558                 | 0.479                 | 0.418                | 1     | 0          | 0.497                       | 5       |
| Lm6    | 0.402                     | 0.562                 | 0.400                 | 0.351                | 0.655 | 0.146      | 0.419                       | 6       |

**Table S5.** Primers used for the real-time quantitative PCR. F: Forward primer. R: Reverse primer.

| Gene ID             | Gene Symbol                                      | Primers                                                    |
|---------------------|--------------------------------------------------|------------------------------------------------------------|
| Unigene26285_All    | probable metal-nicotianamine transporter<br>YSL6 | F:GTATCTGTCATACTCGGTGATGG<br>R:CCATCCTGAACCCTGACAAGAG      |
| CL3029.Contig8_All  | ABC transporter B family member 4-like           | F: CGGGTTTCAGTCAAGATGCTAA<br>R: CCAATGCCTCCAACCTATTCCTG    |
| CL3314.Contig7_All  | ABC transporter B family member 21               | F: TCGCTGTCATTCATCAAGGTTC<br>R: TCTGTCTTATCCTGACGGCTTG     |
| CL55.Contig3_All    | ABC transporter G family member 48-like          | F: AAGAAGCGTGTACAACTGGG<br>R: CGGTGGTTGTAGGAGGGAGAT        |
| CL9563              | Copper-transporting ATPase HMA5                  | F: ATTCGTCTCGGTGAGCAGCA<br>R: CCCCTCGGGATAATCGTAGA         |
| CL4302.Contig10_All | CNR1                                             | F: TGACATATCGGGACAGCGCG<br>R: TTGGGAGGCAAACATGGAGC         |
| CL12636.Contig3_All | CNR2                                             | F: CATCGATTGCTTCGACGACCG<br>R: CAAGATCCGAGATTGGCTCTCC      |
| CL7906.Contig2_All  | CNR13                                            | F: CACGGAGTTCTACACCTGTTCC<br>R:<br>AATCCTTGAGAAGGTTCCACAGG |
| CL13487.Contig2_All | Metal transporter NRAMP1                         | F: CTAGGTCCTTGGCAATTGTGC<br>R:<br>AGAACCGATCACCCATGTTAGC   |
| CL10094.Contig3_All | Metal transporter NRAMP6                         | F: AATCCAGCGCGATTGTCTACG<br>R: GAACCCCTGCATGATGTACTGG      |
| Unigene810_All      | Metal tolerance protein 2-like                   | F: AGAAGGAAGGGAGTGGGCTG<br>R: GCCTGAGACAACAAGCCCAGC        |
| CL15025C1_All       | Actin                                            | F: TACGACCAGGAGATGGAGACC<br>R: GAAGGAAGGCTGGAAGAGGAC       |
